# Supplementary material
Source: publisher figshare collection journal article supplement (https://tandf.figshare.com/ndownloader/files/22528148)
Supplement: Supplementary file 1 [file 22528148]

**Supplementary Information for**

**DUAL-CAVITY SPECTROMETER FOR MONITORING BROADBAND LIGHT EXTINCTION BY ATMOSPHERIC AEROSOLS**

Aiswarya Saseendran1, Susan Mathai2, Shreya Joshi1,2, Anoop Pakkattil1, Tyler Capek2, Gregory Kinney2, Claudio Mazzoleni2*, and Ravi Varma1*

1 *National Institute of Technology Calicut, Calicut, Kerala, India.*

2 *Michigan Technological University, Physics Department and Atmospheric Sciences Program, Houghton, Michigan, USA.*


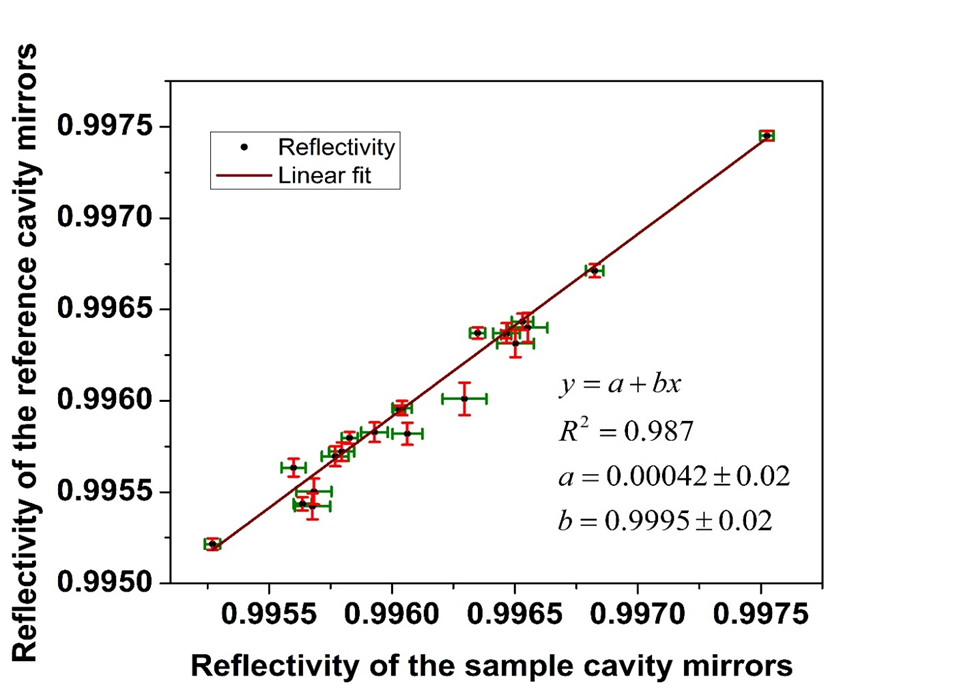


Figure S1. Linearity between the reflectivity values calculated for both cavities and plotted against each other. The error bars indicate one standard deviation (vertical and horizontal) of the values over all the points in each 5 nm bin.

Fig. S2(a)


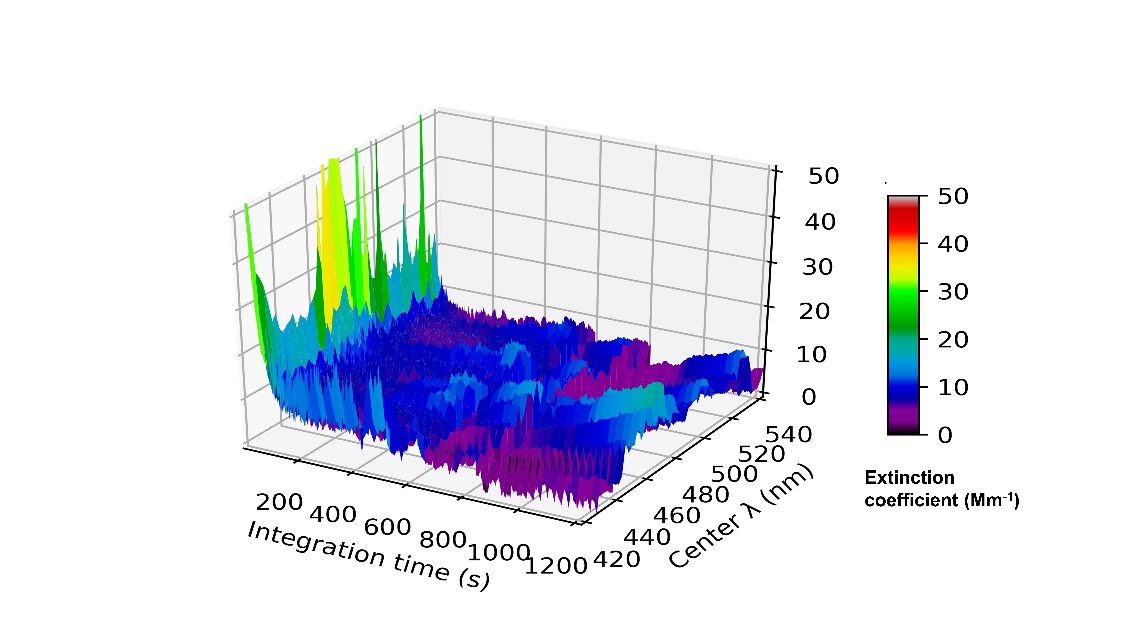


Fig. S2(b)


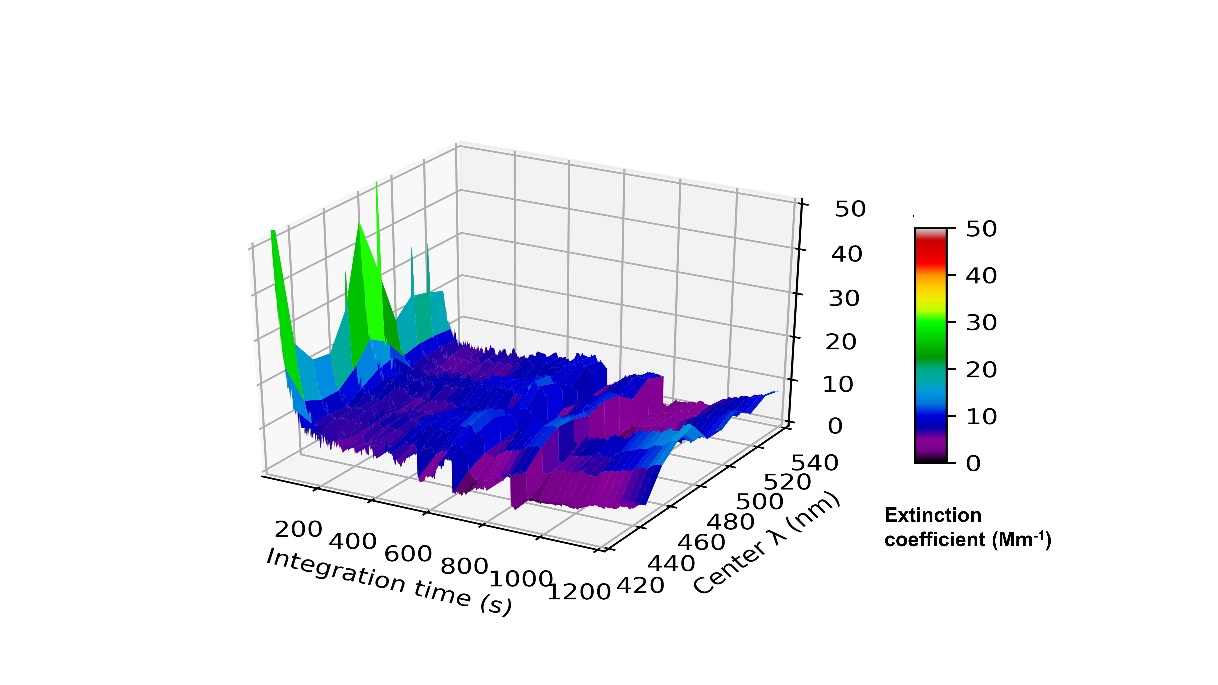


Fig. S2(c)


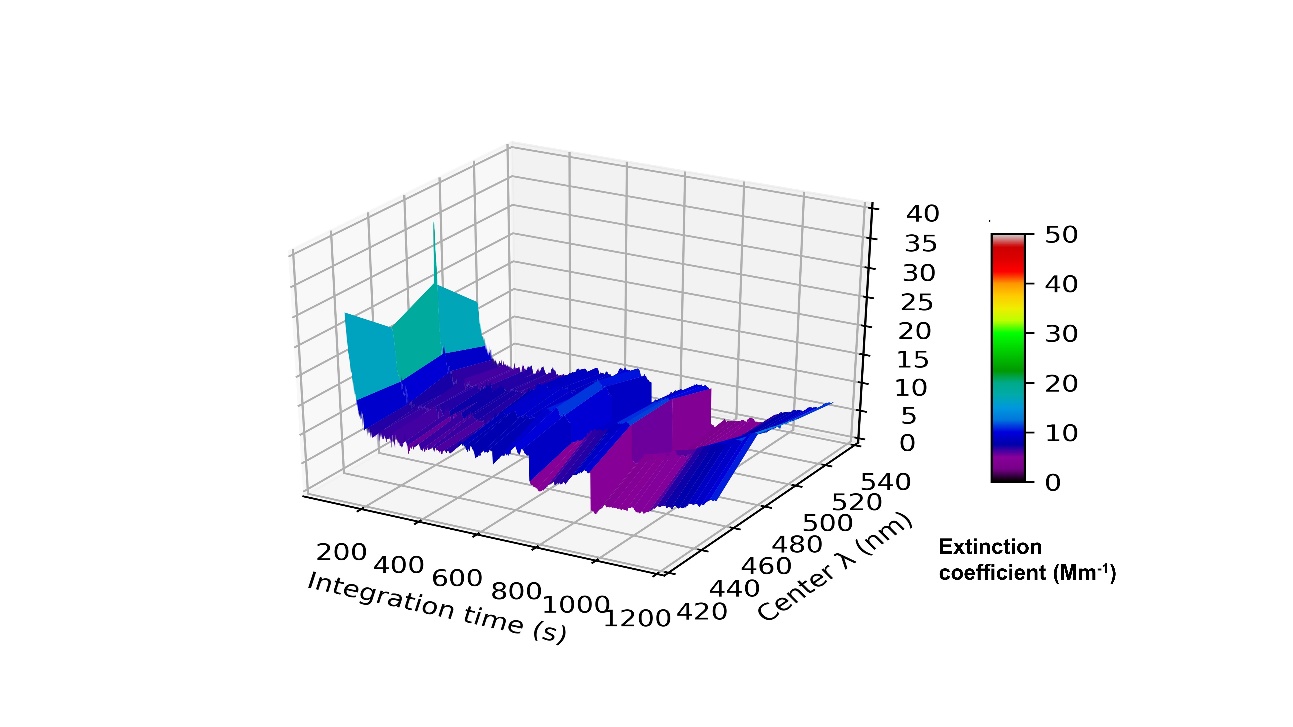


Figure S2. Allan deviation plot for a wavelength bin size of a) 2 nm, b) 10 nm, c) 25 nm.
